# Supplementary material for: The role of 3-OH in the self-assembly of pharmaceutical cocrystals of dihydroflavonol with 4,4′-bipyridine
Source: Royal Society of Chemistry journal article supplement (doi:10.1039/d0nj04113k), 2020-12-21
Supplement: d0nj04113k1.pdf [file d0nj04113k1.pdf]

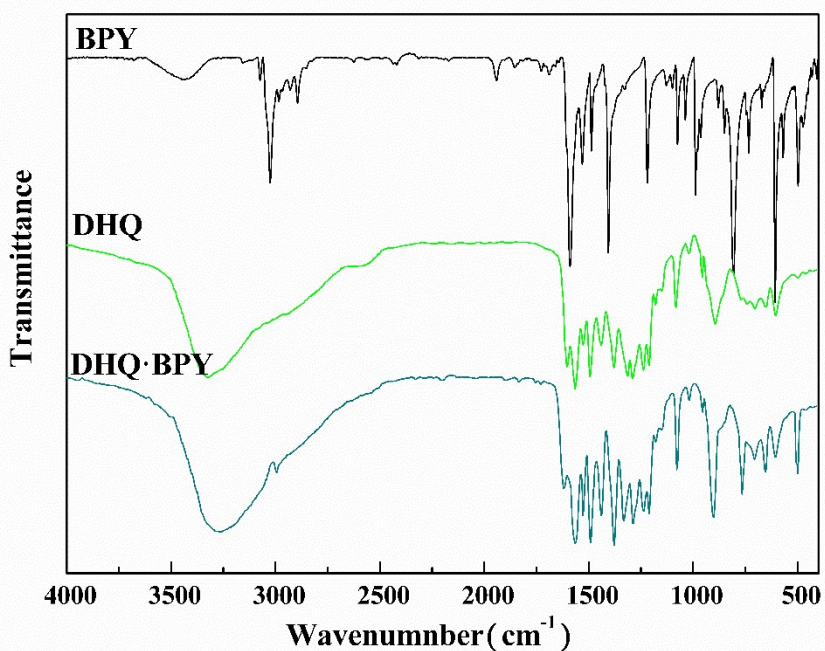

Fig. S1. IR spectra of BPY, DHQ and DHQ·BPY (the test temperature was 298K).

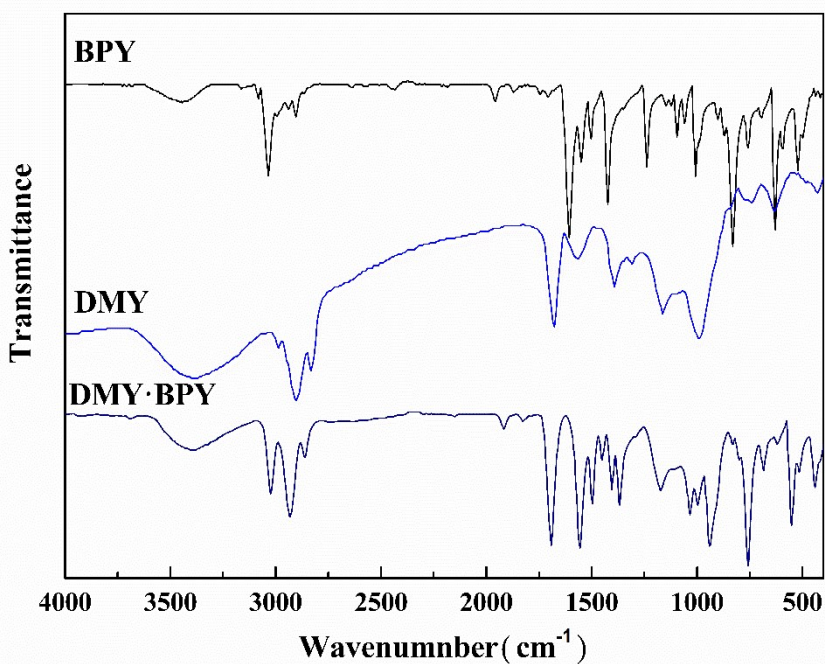

Fig. S2. IR spectra of BPY, DMY and DMY·BPY (the test temperature was 298K).

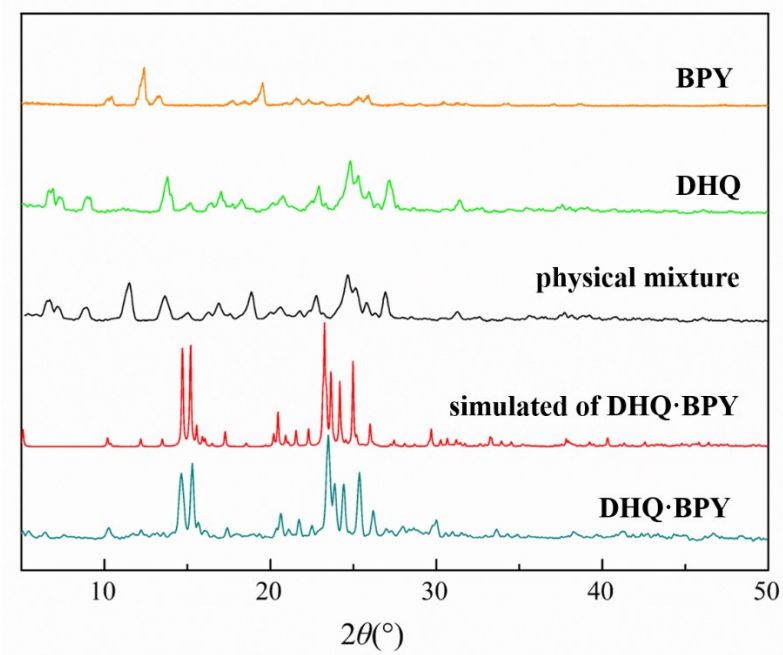

**Fig. S3.** Comparison of XRD patterns: experimental XRD patterns of BPY, DHQ, DHQ·BPY, physical mixture of BPY and DHQ and the simulated patterns of DHQ·BPY. (the test temperature was 298K).

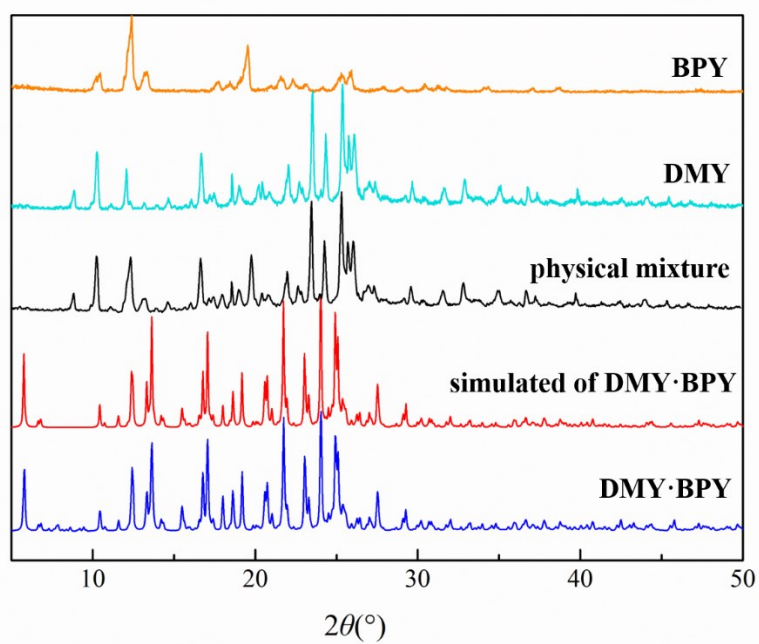

**Fig. S4.** Comparison of XRD patterns: experimental XPRD patterns of BPY, DMY, DMY·BPY, physical mixture of BPY and DMY and the simulated patterns of DMY·BPY. (the test temperature was 298K).

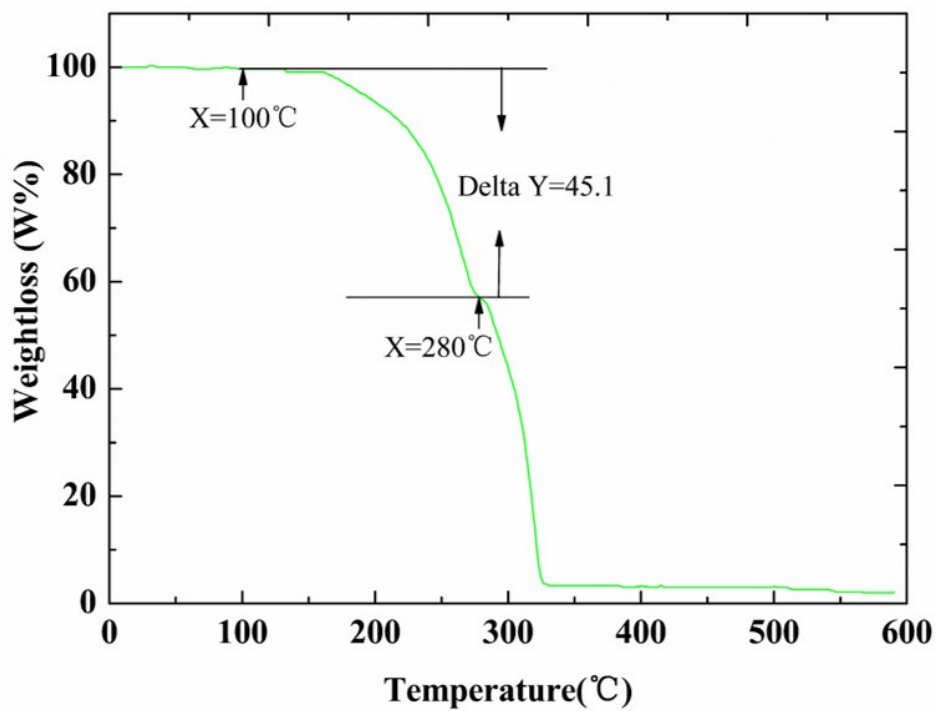

Fig. S5. TGA curve of DHQ-BPY.

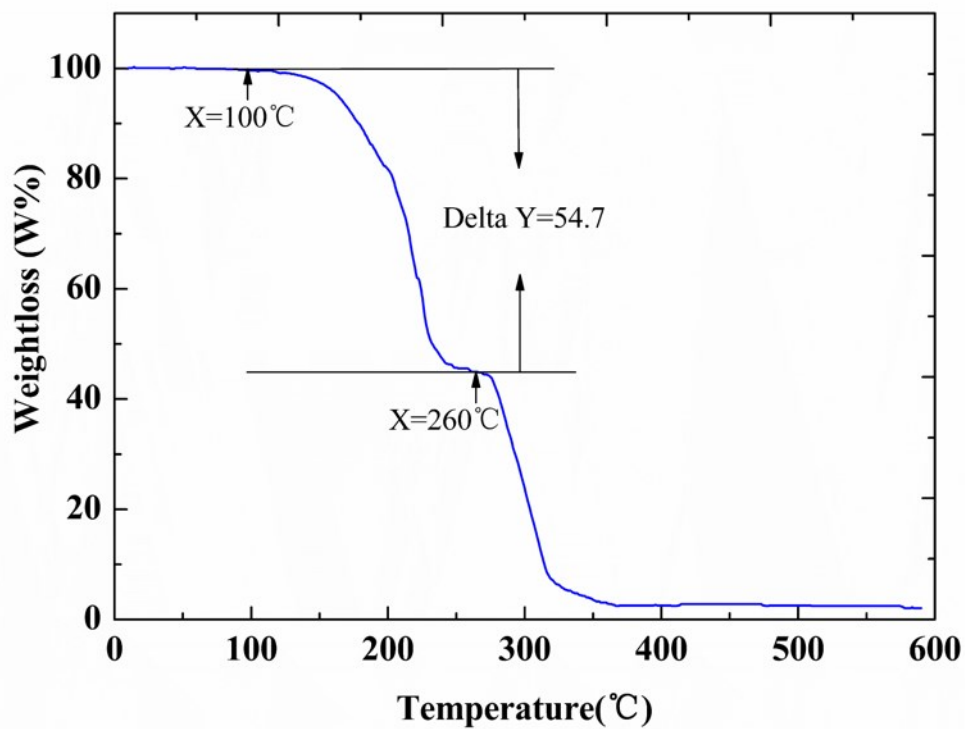

Fig. S6. TGA curve of DMY-BPY.

**Table S1** Hydrogen bond lengths/Å and angles/° for DHQ·BPY.

| D-H···A                     | d(D-H) | d(H···A) | d(D···A) | <(DHA) |
|-----------------------------|--------|----------|----------|--------|
| O1-H1···O2                  | 0.82   | 2.32     | 2.748(4) | 113    |
| O1-H1···N2 <sup>#1</sup>    | 0.82   | 2.00     | 2.735(5) | 150    |
| O2-H2···O3 <sup>#2</sup>    | 0.82   | 2.16     | 2.979(4) | 172    |
| O3-H3···N6 <sup>#2</sup>    | 0.82   | 1.94     | 2.718(4) | 159    |
| O5-H5···O4                  | 0.82   | 1.86     | 2.588(4) | 147    |
| O6-H6···N4 <sup>#3</sup>    | 0.82   | 1.86     | 2.659(4) | 164    |
| O8-H8···O10                 | 0.82   | 1.87     | 2.593(4) | 147    |
| O9-H9···N5                  | 0.82   | 1.88     | 2.669(4) | 163    |
| O11-H11···N3 <sup>#4</sup>  | 0.82   | 1.91     | 2.721(4) | 170    |
| O13-H13···O11 <sup>#5</sup> | 0.82   | 2.20     | 3.014(5) | 174    |
| O14-H14···O13               | 0.82   | 2.30     | 2.725(5) | 113    |
| O14-H14···N1                | 0.82   | 2.01     | 2.727(5) | 146    |
| C16-H16···O14 <sup>#6</sup> | 0.93   | 2.55     | 3.443(5) | 161    |

#1 =x,-1+y,1+z; #2=-1-x,-1/2+y,-z; #3=-1+x,-1+y,z; #4=-1-x,-1/2+y,-1-z; #5=-2-x,1/2+y,-1-z;  
#6=-1-x,1/2+y,-1-z

**Table S2** Hydrogen bond lengths/Å and angles/° for DMY·BPY.

| D-H···A                     | d(D-H) | d(H···A) | d(D···A)  | <(DHA) |
|-----------------------------|--------|----------|-----------|--------|
| O1-H1···N3                  | 0.82   | 1.91     | 2.711(4)  | 165    |
| O2-H2···O3                  | 0.82   | 2.24     | 2.669(4)  | 113    |
| O2-H2···N2 <sup>#1</sup>    | 0.82   | 2.14     | 2.917(5)  | 159    |
| O3-H3···N1                  | 0.82   | 1.89     | 2.670(5)  | 159    |
| O5A-H5A···O6                | 0.82   | 2.39     | 2.722(17) | 105    |
| O5A-H5A···N4 <sup>#2</sup>  | 0.82   | 1.95     | 2.697(17) | 150    |
| O7-H7···N5 <sup>#3</sup>    | 0.82   | 1.87     | 2.662(5)  | 161    |
| O8-H8···O6                  | 0.82   | 1.84     | 2.571(4)  | 148    |
| C7A-H7A···O7 <sup>#3</sup>  | 0.98   | 2.54     | 3.470(8)  | 158    |
| C27-H27···O5A <sup>#4</sup> | 0.93   | 2.38     | 3.303(16) | 170    |
| C27-H27···O5B <sup>#4</sup> | 0.93   | 2.55     | 3.48(4)   | 177    |
| C29-H29···O5B <sup>#5</sup> | 0.93   | 2.47     | 3.40(5)   | 174    |
| C32-H32···O2 <sup>#6</sup>  | 0.93   | 2.43     | 3.079(5)  | 127    |
| C35-H35···O6 <sup>#2</sup>  | 0.93   | 2.43     | 3.137(6)  | 133    |

#1=2-x,1-y,1-z; #2=1-x,3-y,2-z; #3=-x,2-y,1-z; #4=-1+x,y,z; #5=-x,2-y,2-z; #6=x,1+y,z.
